# Supplementary material
Source: PubMed Central journal article supplement (PMC5072423)
Supplement: cdd201627x1.pdf [file cdd201627x1.pdf]

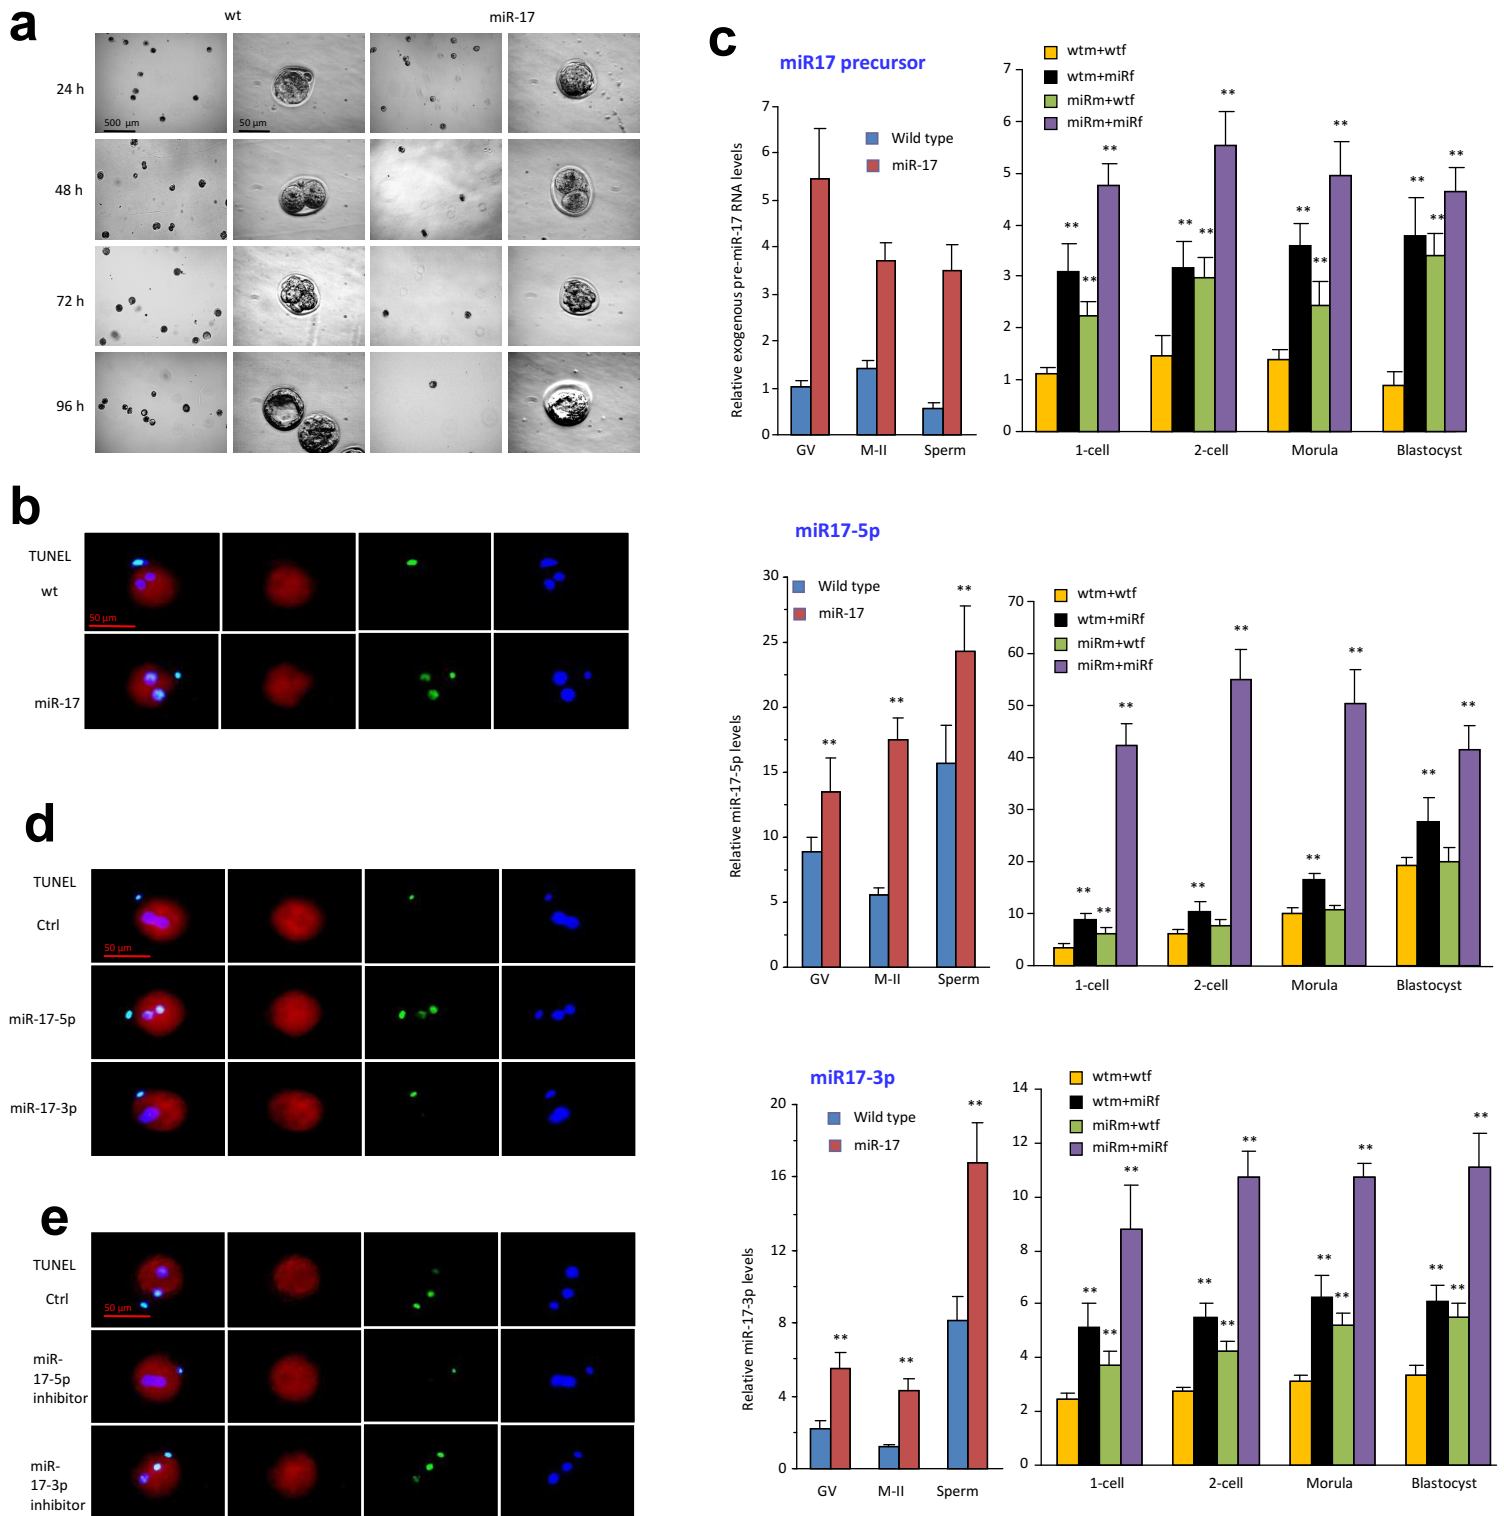

**Fig S1. Expression of miR-17 inhibited early embryonic development**

(a) Photos of embryos in various stages collected from oviduct or uterus in 24, 48, 72 and 96 hours after hCG treatment. Decreased numbers of embryos observed in miR-17 transgenic mice (miRm+miRf). (b) Increased TUNEL staining in the nuclei of miR-17 transgenic zygotes collected from oviduct 24 hours after hCG injection (miRm+miRf). (c) Upper, ectopic expression of miR-17 not only promoted pre-miR-17 expression in the embryos of various stages, but also enhanced pri-miR-17 expression in unfertilized oocytes (GV and M-II) and sperms. \*\*  $p < 0.01$ . Error bars, SD ( $n=4$ ).

Middle, miR-17 transgenic mice expressed increased levels of miR-17-5p in unfertilized oocytes (GV and M-II), sperms, and embryos of zygote, 2-cell, morula and blastocyst stage. \*\*  $p < 0.01$ . Error bars, SD ( $n=4$ ). Lower, miR-17 transgenic mice expressed increased miR-17-3p in unfertilized oocytes (GV and M-II), sperms, and embryos of zygote, 2-cell, morula and blastocyst stage. \*\*  $p < 0.01$ . Error bars, SD ( $n=4$ ). (d) Wildtype zygotes were microinjected with control oligos, miR-17-5p and miR-17-3p, and incubated for 8 hours, followed by TUNEL staining. Expression of miR-17-5p increased TUNEL staining. (e) Transgenic zygotes were microinjected with 2 pl control oligos, miR-17-5p inhibitor (IN) and miR-17-3p IN, and incubated for 8 hours, followed by TUNEL staining. Expression of miR-17-5p IN decreased TUNEL staining.

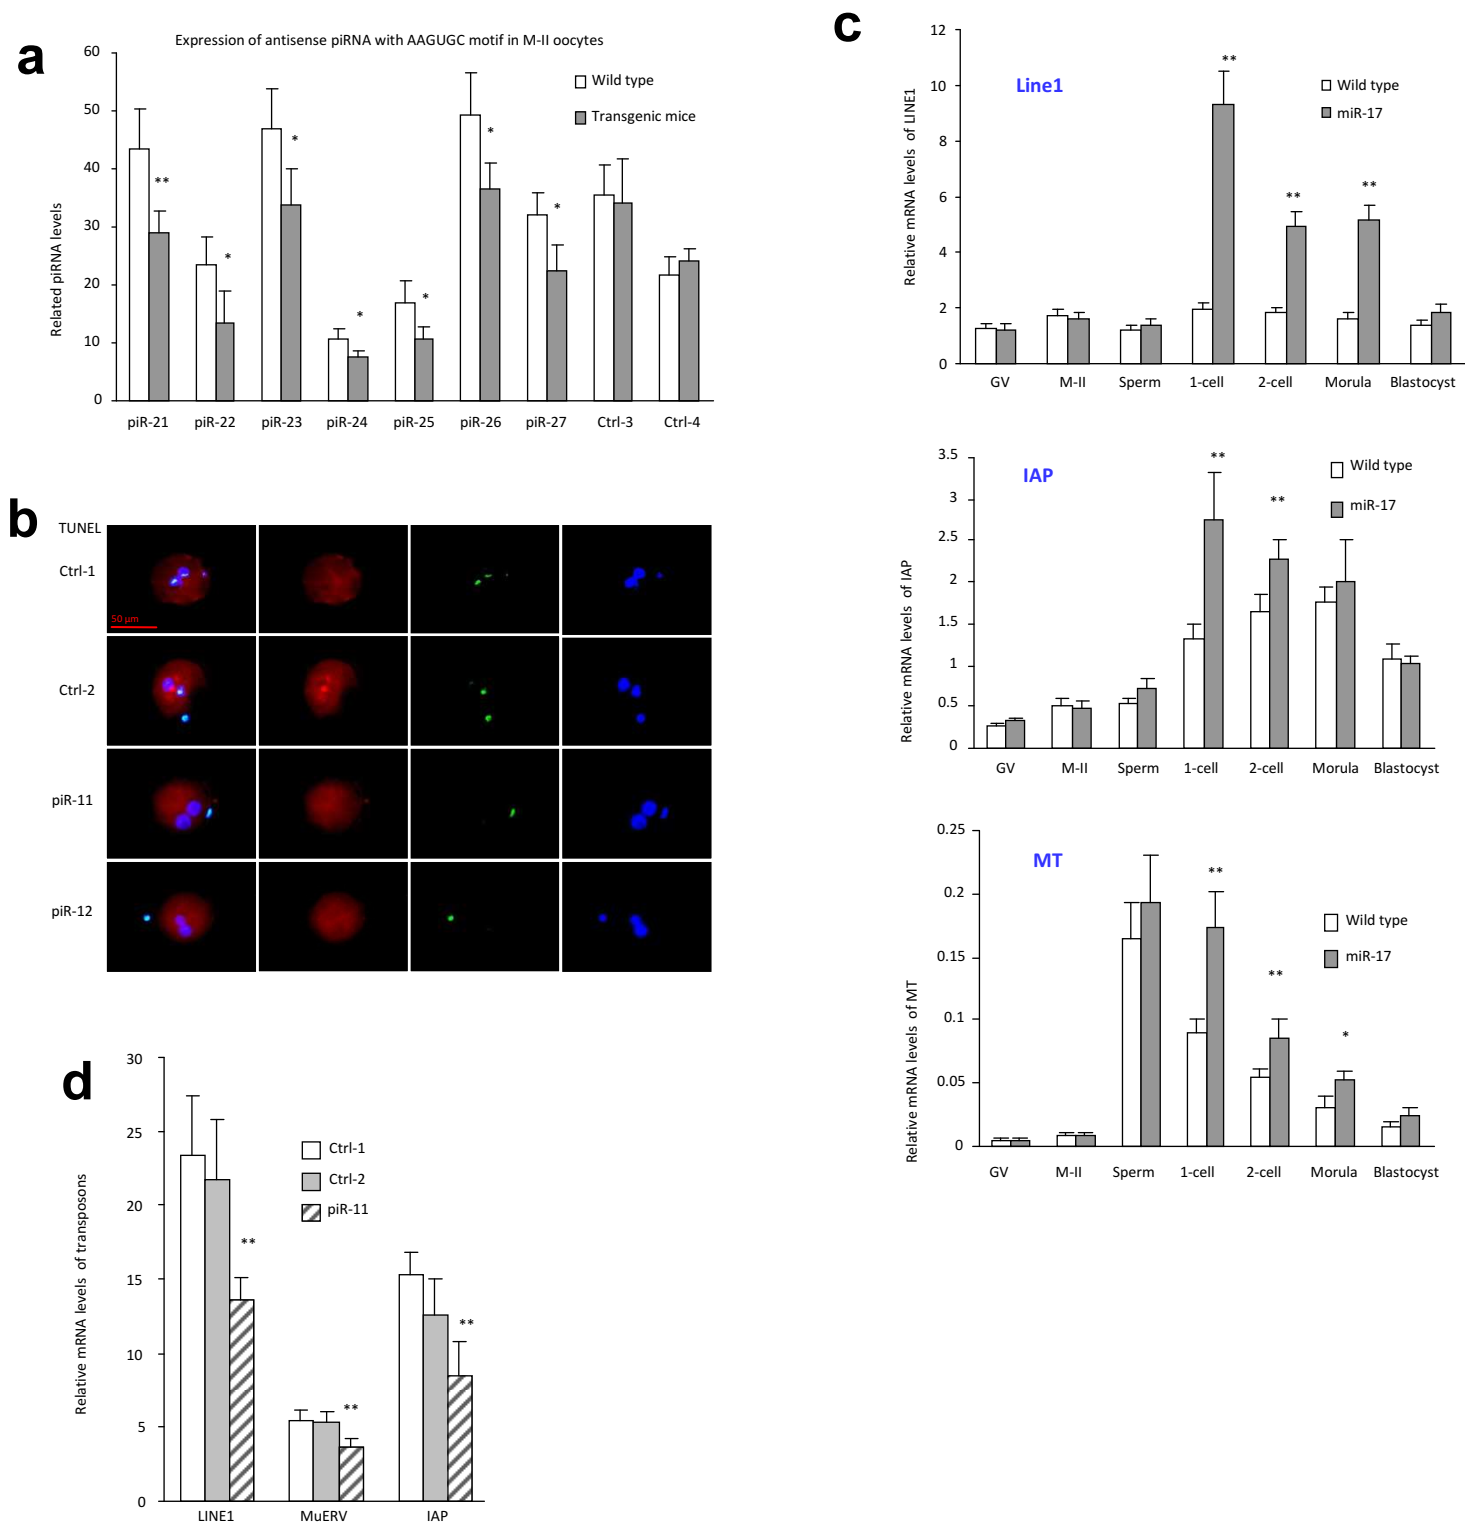

**Fig S2. piRNA expression were repressed, while transposon was promoted in the early embryos of miR-17 transgenic mice**  
**(a)** miR-17 transgenic mice expressed decreased piRNA (antisense) levels with AAGUGC motif, but not those without AAGUGC motif. \*  $p < 0.05$ . \*\*  $p < 0.01$ . Error bars, SD ( $n=4$ ). **(b)** Transgenic zygotes were microinjected with 2  $\mu$ l control 1 (PBS), control 2, and piR-11, and incubated for 8 hours, followed by TUNEL staining. Expression of piR-11 decreased TUNEL levels. **(c)** Upper, 50 sperms, unfertilized and fertilized oocytes were collected for real-time PCR. miR-17 embryos expressed increased mRNA levels of retrotransposon LINE1 in zygote, 2-cell and morula stages. \*\*  $p < 0.01$ . Error bars, SD ( $n=4$ ). Middle, miR-17 embryos expressed increased mRNA levels of retrotransposon IAP in zygote and 2-cell stage. \*\*  $p < 0.01$ . Error bars, SD ( $n=4$ ). Lower, miR-17 embryos expressed increased mRNA levels of retrotransposon MT in zygote, 2-cell and morula stages. \*  $p < 0.05$ , \*\*  $p < 0.01$ . Error bars, SD ( $n=4$ ). **(d)** Transgenic zygotes were microinjected with 2  $\mu$ l control 1 (PBS), control 2 and piR-11, and incubated for 8 hours. Real-time PCR analysis showed that piR-11 injection repressed mRNA levels of retrotransposon LINE1, MuERV, IAP and MT in zygotes. \*\*  $p < 0.01$ . Error bars, SD ( $n=4$ ).

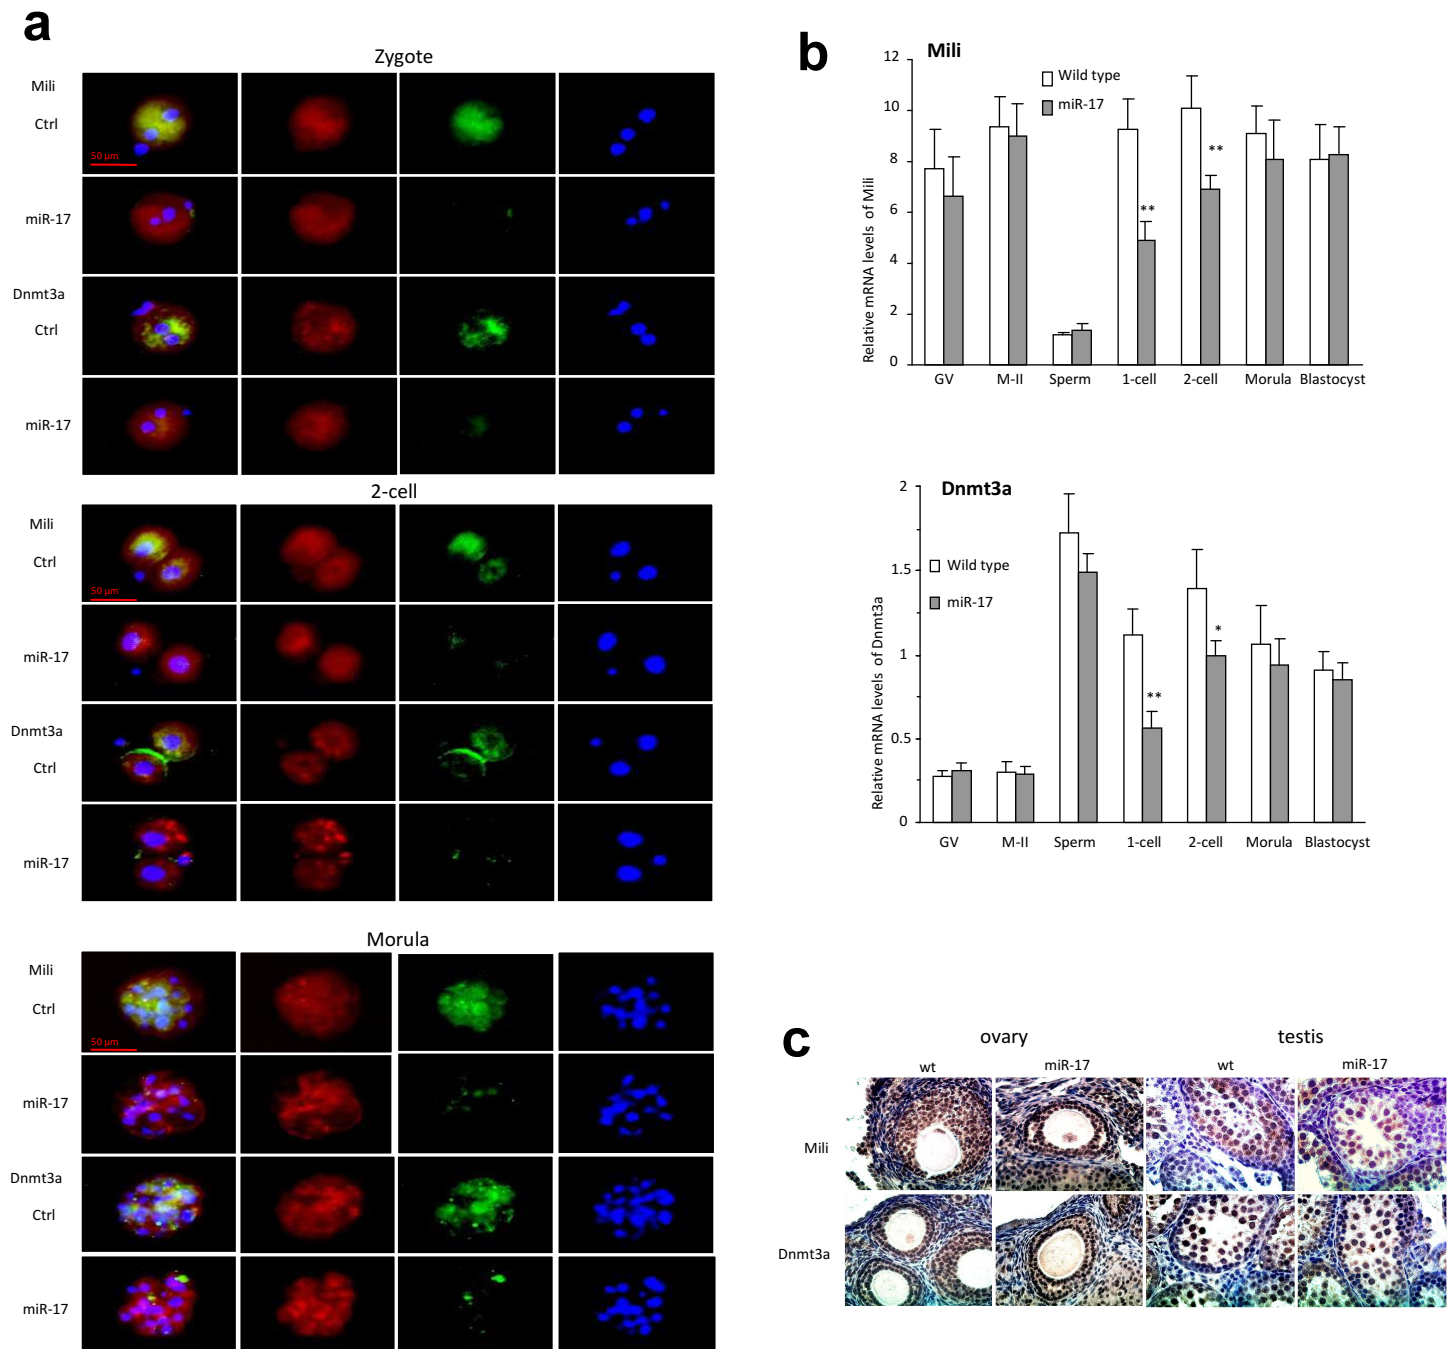

**Fig S3. Effect of miR-17 on Mili and Dnmt3a expression.**

(a) Embryos were stained with phalloidins (red), DAPI (blue), and green fluorescence showing expression of Mili or Dnmt3a. miR-17 transgenic embryos expressed decreased Mili and Dnmt3a protein in 2-cell, morula and blastocyst stages.

(b) 50 sperms, unfertilized and fertilized oocytes were collected for real-time PCR. miR-17 embryos expressed decreased mRNA levels of Mili (upper) and Dnmt3a (lower) in zygote and 2-cell stage. \*  $p < 0.05$ . \*\*  $p < 0.01$ . Error bars, SD ( $n=4$ ).

(c) IHC staining showing expression of miR-17 did not change Mili and Dnmt3a expression in ovary and testis tissues.

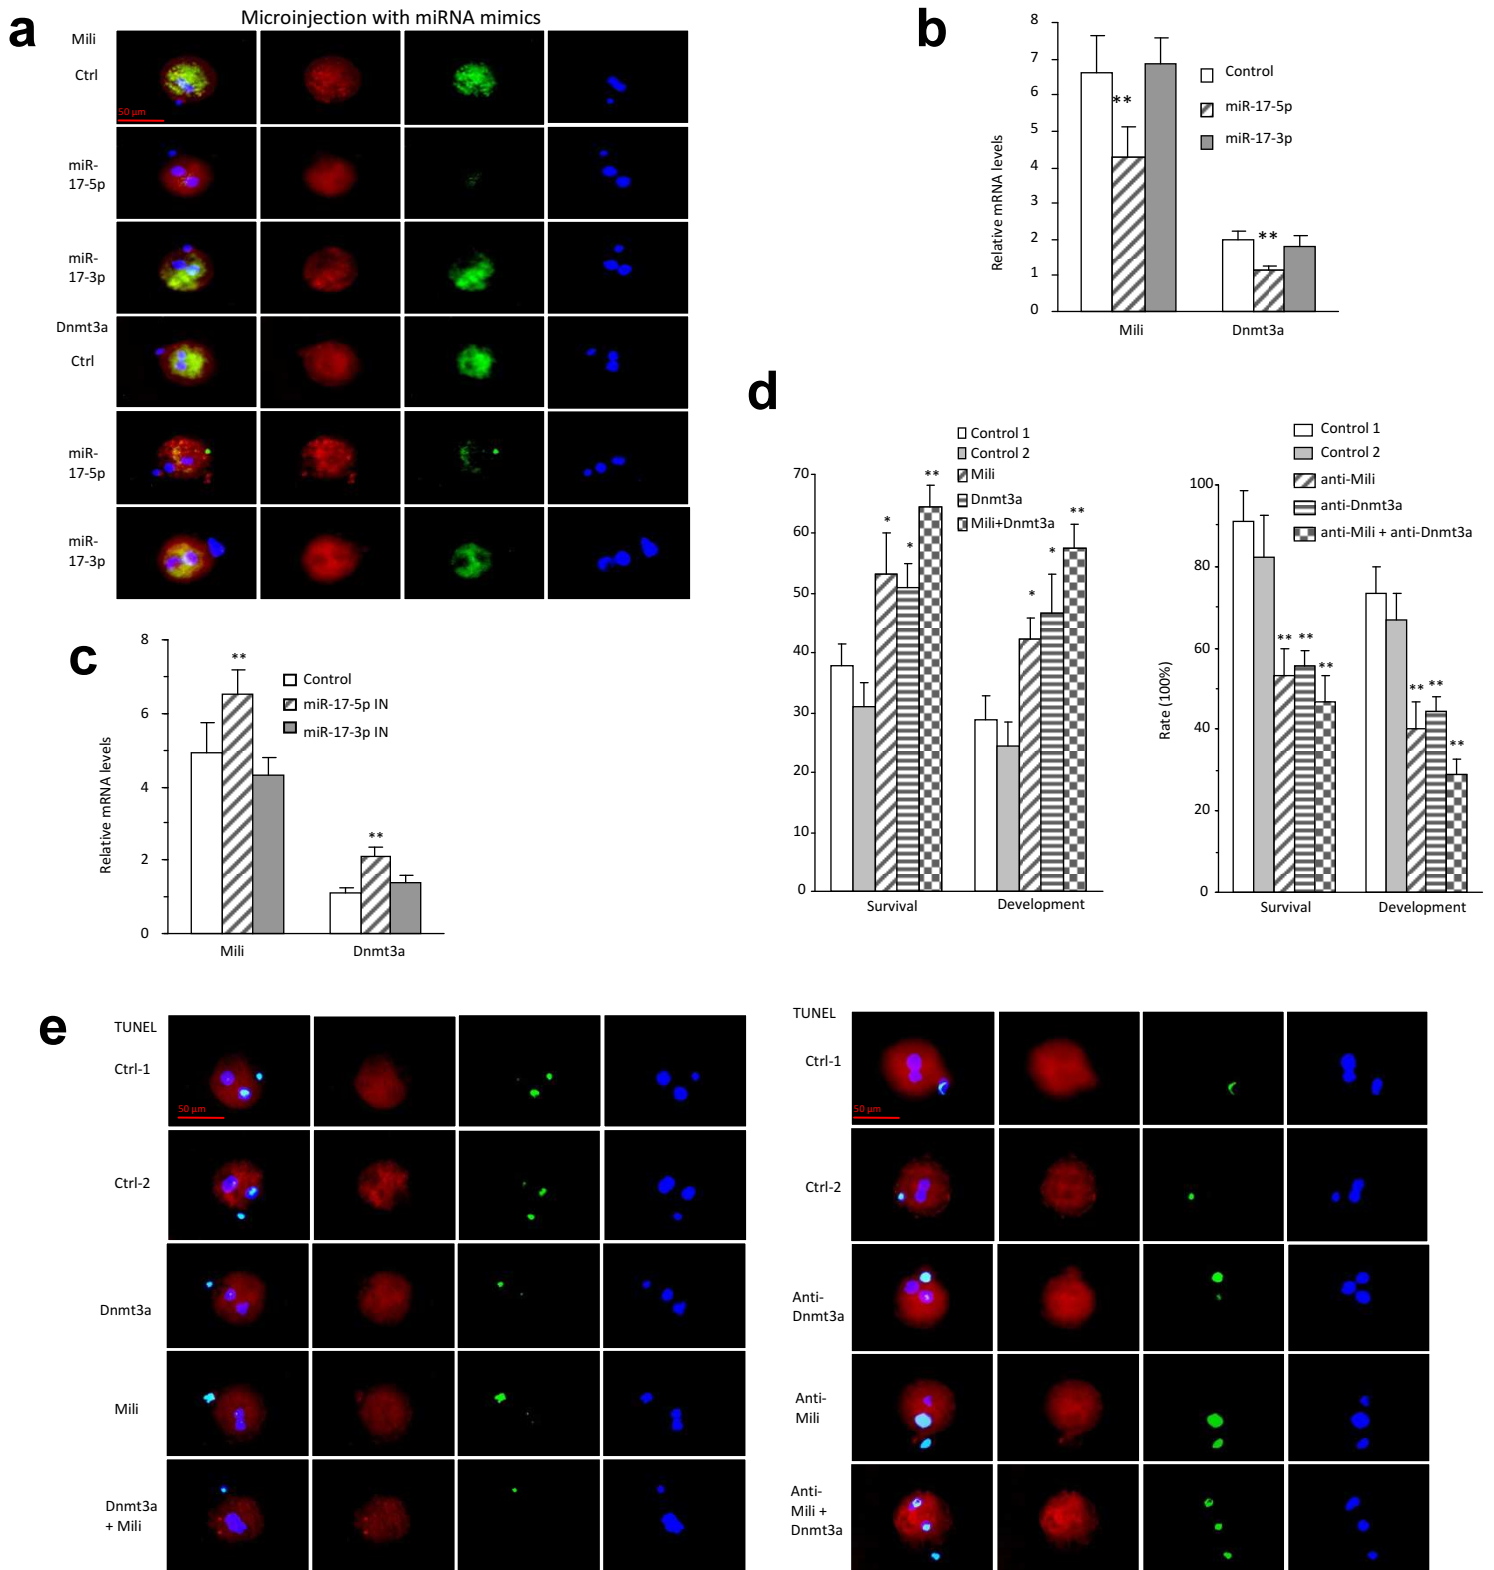

**Fig S4. miR-17 targeting Mili and Dnmt3a** (a) Embryos were stained with phalloidins (red), DAPI (blue), and green fluorescence showing expression of Mili and Dnmt3a. miR-17 embryos expressed decreased levels of Mili and Dnmt3a. (b) Wildtype zygotes were microinjected with miR-17-5p, miR-17-3p, and control oligos, and incubated for 8 hours, followed by real-time PCR. miR-17-5p injection repressed Mili and Dnmt3a expression. \*\*  $p < 0.01$ . Error bars, SD ( $n = 4$ ). (c) Wildtype zygotes were microinjected with miR-17-5p-IN and miR-17-3p-IN and control oligos, and incubated for 8 hours, followed by real-time PCR. Injection with miR-17-5p-IN increased mRNA levels of Mili and Dnmt3a. \*\*  $p < 0.01$ . Error bars, SD ( $n = 4$ ). (d) Left, miR-17 zygotes were microinjected with 2 pI control 1 (PBS), control 2 (mouse Ig), Mili, Dnmt3a, and Mili+Dnmt3a, and incubated for 96 hours. Injection with Mili, Dnmt3a, and Mili+Dnmt3a increased rates of survival and development. Right, Injection with antibodies against Mili and/or Dnmt3a decreased rates of survival and development in wildtype zygotes. \*  $p < 0.05$ , \*\*  $p < 0.01$ . Error bars, SD ( $n = 4$ ). (e) miR-17 zygotes performed as in (e) were subject to TUNEL staining. Injection with Mili and/or Dnmt3a decreased (left), while injection with anti-Mili and/or anti-Dnmt3a increased (right) TUNEL staining.

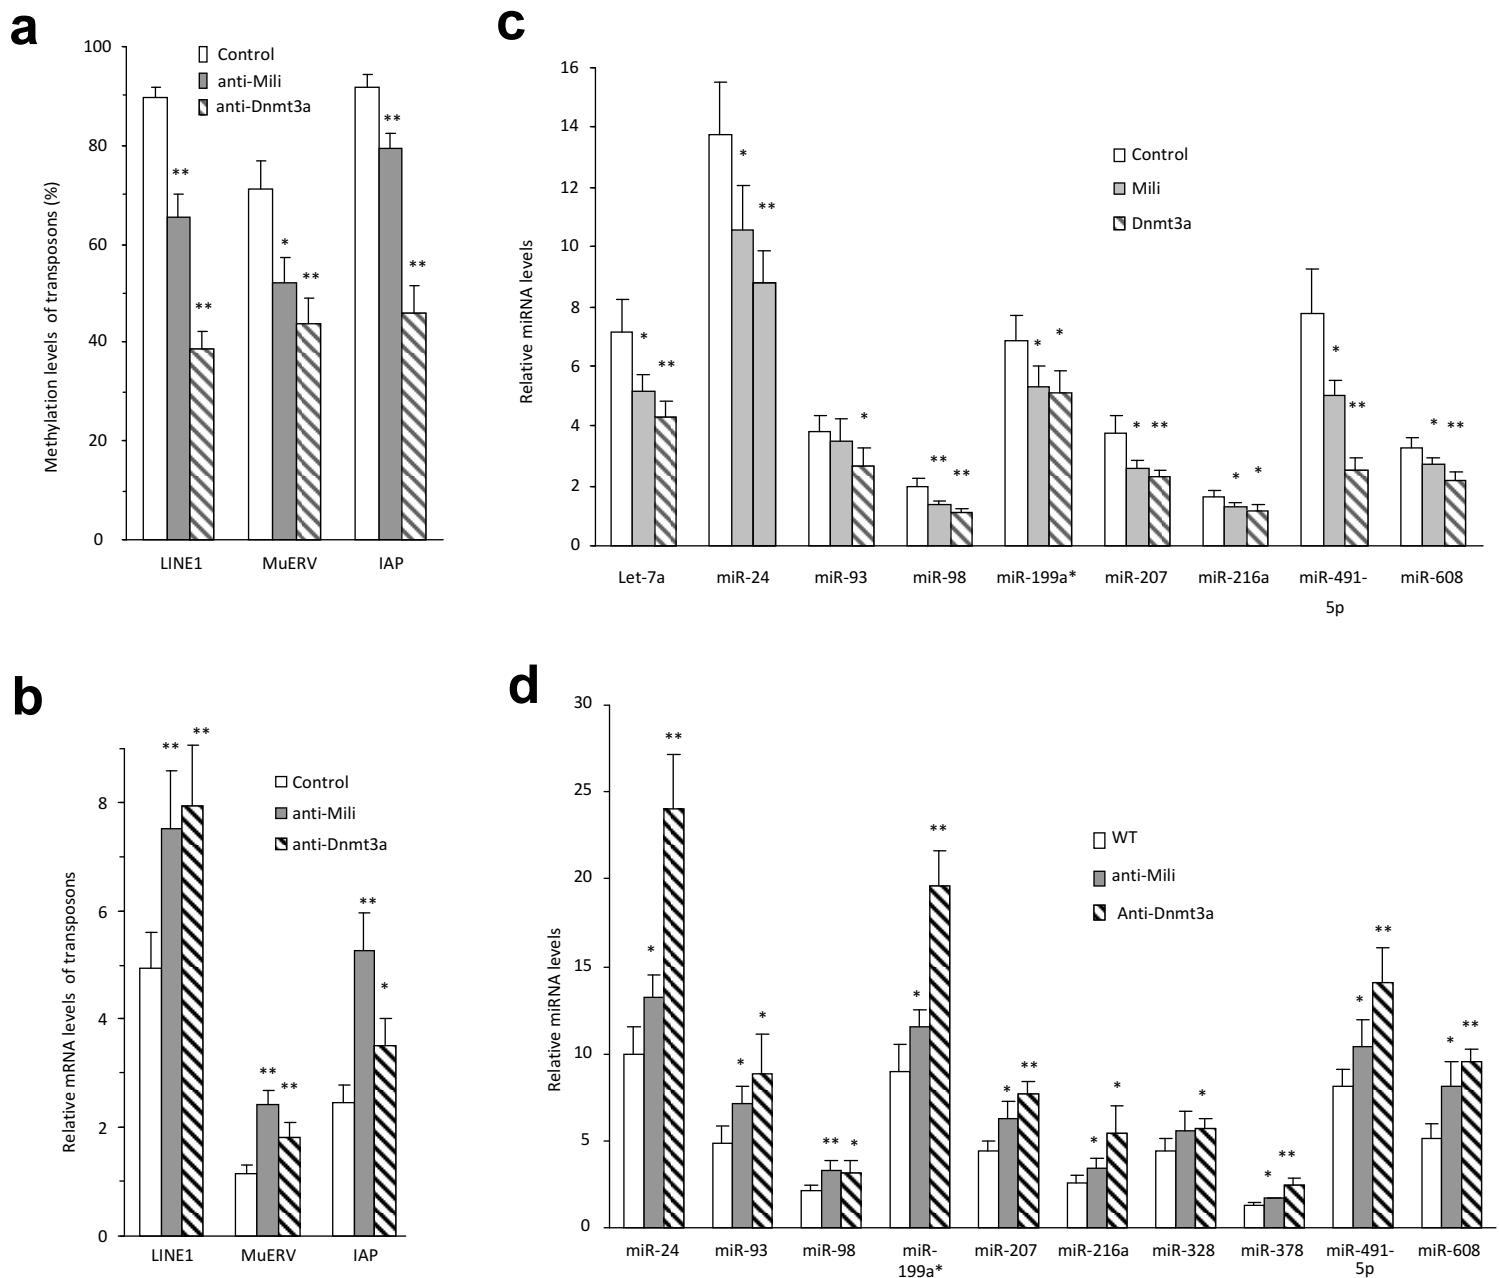

**Fig S5. Methylation activities of Mili and Dnmt3a**

**(a)** MSP analysis indicated that injection with anti-Mili or anti-Dnmt3a antibody decreased methylation levels of retrotransposon LINE1, MuERV and IAP. \*  $p < 0.05$ , \*\*  $p < 0.01$ . Error bars, SD ( $n=4$ ).

**(b)** miR-17 zygotes were microinjected with 2  $\mu$ l control 1 (PBS), control 2 (mouse Ig), Mili, Dnmt3a, and Mili+Dnmt3a, incubated for 8 hours, followed by real-time PCR analysis. Injection with anti-Mili or anti-Dnmt3a antibody increased mRNA levels of LINE1, MuERV, IAP and MT. \*  $p < 0.05$ , \*\*  $p < 0.01$ . Error bars, SD ( $n=4$ ).

**(c)** Injection with Mili or Dnmt3a repressed miRNA levels in zygotes. \*  $p < 0.05$ , \*\*  $p < 0.01$ . Error bars, SD ( $n=4$ ).

**(d)** Injection with anti-Mili or anti-Dnmt3a antibody increased miRNA expression. \*  $p < 0.05$ , \*\*  $p < 0.01$ . Error bars, SD ( $n=4$ ).

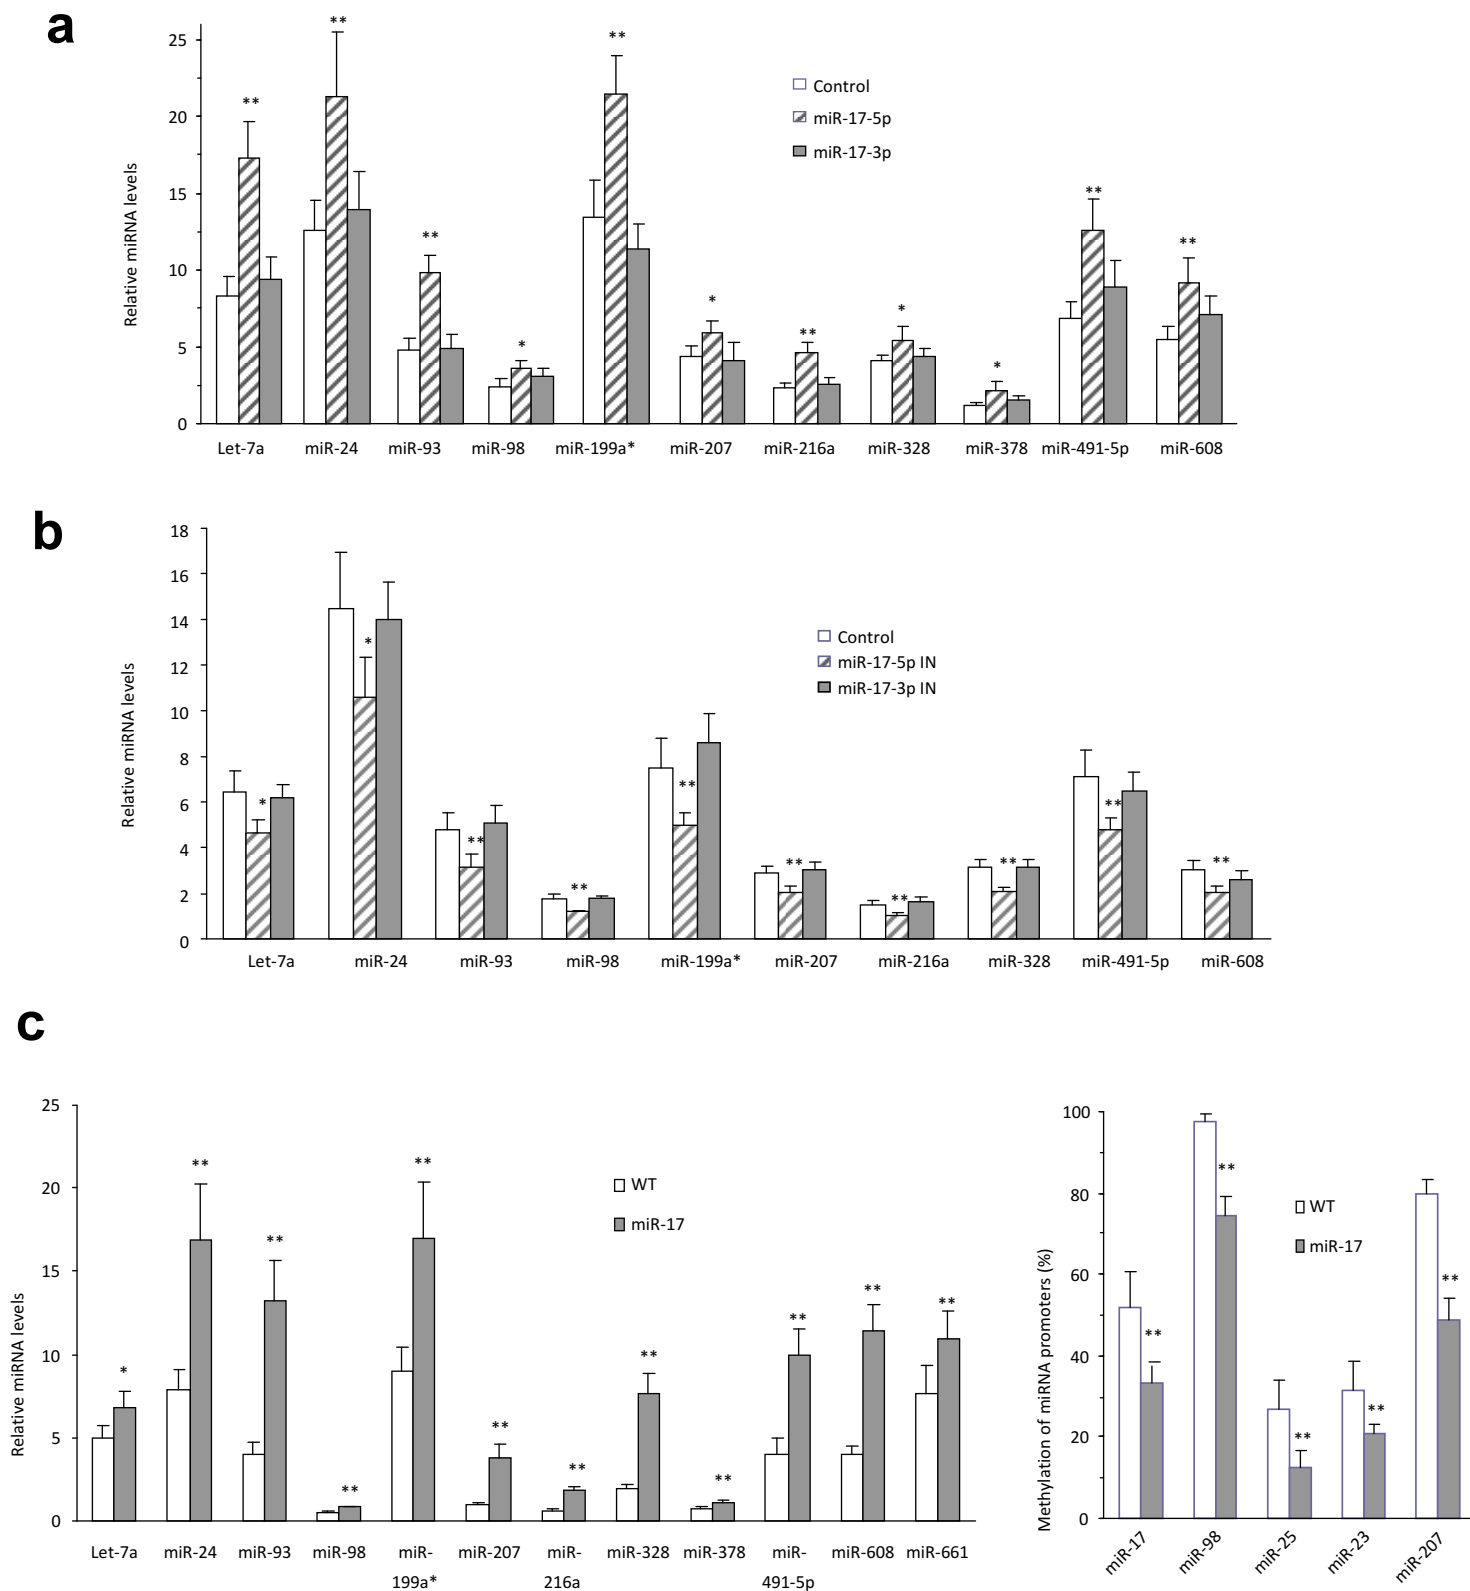

**Fig S6. miRNAs were globally enhanced.**

**(a)** Injection with miR-17-5p enhanced miRNA levels in zygotes. \*  $p < 0.05$ , \*\*  $p < 0.01$ . Error bars, SD ( $n = 4$ ).

**(b)** Injection with miR-17-5p-IN repressed miRNA levels in zygotes. \*  $p < 0.05$ , \*\*  $p < 0.01$ . Error bars, SD ( $n = 4$ ).

**(c)** Left, miR-17 zygotes (50 zygotes) expressed increased levels of miRNAs. Right, Decreased methylation of miRNA genes was found in miR-17 zygotes. \*  $p < 0.05$ , \*\*  $p < 0.01$ . Error bars, SD ( $n = 4$ ).

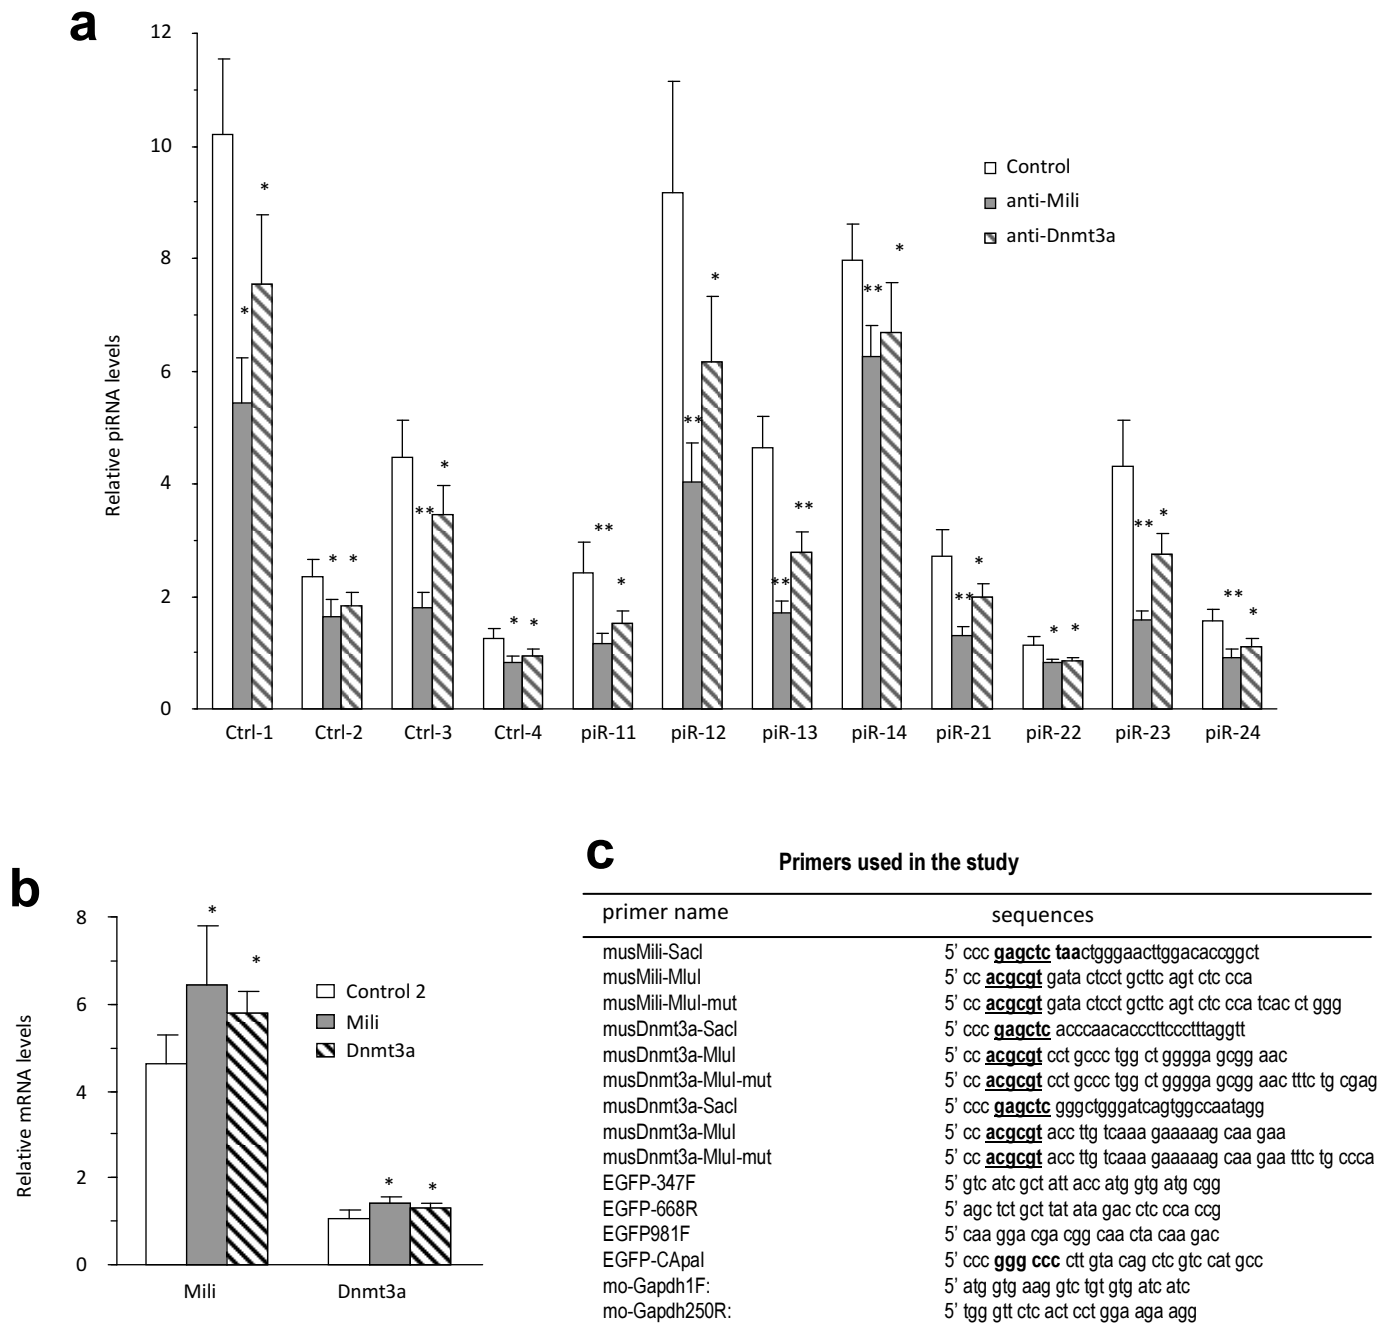

**Fig S7. Inject with Mili and Dnmt3a**

**(a)** Injection with anti-Mili or anti-Dnmt3a antibody decreased piRNA expression in zygotes. \*  $p < 0.05$ . Error bars, SD ( $n=4$ ).

**(b)** Injection with Mili or Dnmt3a increased mRNA levels of both Mili and Dnmt3a. \*  $p < 0.05$ . \*\*  $p < 0.01$ . Error bars, SD ( $n=4$ ).

**(c)** Primers used in the study are listed.
