# Supplementary material
Source: PubMed Central journal article supplement (PMC5072423)
Supplement: cdd201627x3.pdf [file cdd201627x3.pdf]

# OFFPRINT & PAGE CHARGE AUTHORISATION FORM

Please return this form by fax to: + 39 06 7259 6977 or e-mail to: cell.death.differ@uniroma2.it

## 1. Details

Journal: **CELL DEATH & DIFFERENTIATION**

Manuscript Number: **ACCEPT CDD-15-0508R**

Article Title: **Reciprocal regulation of miRNAs and piRNAs in embryonic development**

## 2. Page Charges

I authorize NPG to invoice me for page charges of **£153 / \$237** per page (as detailed in the Instructions to Authors).

**Notes: Page charges include any costs incurred by the production of colour figures and so authors will not be separately charged for colour figure production.**

**20% VAT will be added to the total page charge amount for orders from UK and non VAT registered EU based customers. Authors registered for VAT in another EU member country and who supply their VAT registration number will not be charged VAT. Customers outside of the EU will not be charged VAT but local taxes will be added where applicable.**

Signature:  \_\_\_\_\_

Date: **Feb 17, 2016** \_\_\_\_\_

VAT Number: \_\_\_\_\_

## 3. Offprint Order (See pricing table overleaf)

If you would like to order offprints, please complete the following details ensuring that the delivery address is correctly and clearly entered.

Number of offprints required: **X** \_\_\_\_\_ Total cost: **X** \_\_\_\_\_

I agree to pay the costs in full and authorize Nature Publishing Group to invoice me for the above amount.

Signature:  \_\_\_\_\_

Date: \_\_\_\_\_

Print name: \_\_\_\_\_

E-mail: \_\_\_\_\_

### Delivery Address

### Invoice Address (if different)

Name: \_\_\_\_\_

Name: \_\_\_\_\_

Address: \_\_\_\_\_

Address: \_\_\_\_\_

Post code/Zip code: \_\_\_\_\_

Post code/Zip code: \_\_\_\_\_

Country: \_\_\_\_\_

Country: \_\_\_\_\_

Purchase order number: \_\_\_\_\_

VAT number: \_\_\_\_\_ (if applicable)

VAT will be added to orders from UK based authors. Offprints are subject to VAT but at the **reduced rate of 0%**. Local taxes will be added where applicable.

## 4. Payment

Payment for both page charges and offprints can be made by **bank transfer, bank cheque or credit card** after the invoice is issued.

# OFFPRINT & PAGE CHARGE AUTHORISATION FORM

## 5. Pricing - Offprints

Authors in the USA/Canada will be charged in US\$; authors in the rest of the world will be charged in UK Sterling. Prices include postage.

| Number of copies | Number of pages                                                                   |                |                |                  | Additional 4pp |
|------------------|-----------------------------------------------------------------------------------|----------------|----------------|------------------|----------------|
|                  | 1-4                                                                               | 5-8            | 9-12           | 13-16            |                |
|                  | Add £258 (\$397) per 100 copies if colour illustrations are included in offprints |                |                |                  |                |
| 100              | £250 (\$386)                                                                      | £352 (\$543)   | £437 (\$673)   | £561 (\$865)     | £116 (\$179)   |
| 200              | £351 (\$542)                                                                      | £539 (\$830)   | £713 (\$1,078) | £906 (\$1,397)   | £227 (\$349)   |
| 300              | £437 (\$673)                                                                      | £713 (\$1,078) | £990 (\$1,525) | £1,260 (\$1,942) | £318 (\$490)   |

### Please note:

1. All offprint orders must be made on this order form. Offprint orders are not acknowledged on receipt.
2. **OFFPRINT ORDERS CAN ONLY BE ACCEPTED BEFORE THE JOURNAL IS PRINTED.**  
**SUBSEQUENT ORDERS INVOLVE REPRINTING AND REPRINT PRICES ARE SUBSTANTIALLY HIGHER THAN THOSE QUOTED BELOW. NATURE PUBLISHING GROUP DOES NOT ACCEPT RESPONSIBILITY FOR UNPROCESSED ORDERS DUE TO FORMS BEING INCOMPLETE OR WHICH ARRIVE AFTER THE ISSUE DEADLINE.**
3. As only one author receives an offprint order/page charge form it is essential that adequate supplies for all authors of a paper be included on this form.
4. If a purchase order number is required to accompany your order, please ensure that the number is clearly written on the offprint order form. **A purchase order number must be supplied for orders to be billed to US institutions.**
5. Offprints are dispatched within four to eight weeks of publication of the journal.

The Publishers are pleased to help with any enquiries about post-publication reprints.

**Special prices apply for quantities greater than 300. For a quote, please contact the reprints department.**

#### USA/Canada/Northern Europe/UK/ROW:

Tel: +1 212-451-8713

E-mail: [commercial-reprints@us.nature.com](mailto:commercial-reprints@us.nature.com)

#### Asia Pacific:

Tel: +81-3-3267-8775

Fax: +81-3-3267-8746

E-mail: [commercial-reprints@natureasia.com](mailto:commercial-reprints@natureasia.com)

#### Southern Europe / Latin America:

Tel: +34 91 447 4643

Fax: +34 91 447 4609

E-mail: [reprintsnpqi@macmillan.es](mailto:reprintsnpqi@macmillan.es)

#### India:

Tel: +91 124 288 1053

Fax: +91 124 288 1052

E-mail: [commercial-reprints-india@nature.com](mailto:commercial-reprints-india@nature.com)
